# Supplementary material
Source: publisher site journal article supplement (https://www.spandidos-publications.com/4440/downloadSupplementary)
Supplement: Supplementary file 1 [file downloadSupplementary]

## Sheet: Sheet1
Table SVI. A total of 1162 over-lapping genes of differential expression in the GSE40275 and GSE60052 datasets
DN	UP
CLIC5	CDC6
ANKRD29	HELLS
CLDN18	EZH2
FBLN5	RFC4
ANXA3	BRIP1
SLIT3	FIGNL1
FGD5	CCNB2
GPX3	RACGAP1
PAPSS2	CHEK1
SHROOM4	ASPM
AGER	CENPI
PEBP4	AGPAT5
GPRC5A	PBK
ADH1B	CENPF
GPR116	PRC1
FCN3	BUB1
CD93	SNHG1
FIGF	PPAT
ACVRL1	EXO1
FOLR1	ZWINT
AOC3	CENPK
CDH5	CDC20
GIMAP8	CEP78
PDZD2	ATAD2
PTPRB	CDCA8
VEPH1	BUB1B
GPR133	PFN2
CALCRL	NUSAP1
RBPMS	CENPL
AQP1	C3orf14
PGC	BRCA1
HEG1	CCNA2
CD55	PTTG1
SLC39A8	PRPF39
FAM65A	CCDC34
AHNAK	WDHD1
SLC6A4	CBFA2T2
ALPL	CKAP2
C1orf116	RFWD3
ADH1A	RMI1
AKAP13	GDAP1
RBMS3	UNG
CD302	C11orf80
CLEC1A	WDR76
ADAMTS1	FANCA
ATP10A	ADAM22
C4BPA	FAM111B
CAT	CHAF1B
ABI3BP	GGH
C19orf59	ARHGAP11A
ATP13A4	GINS4
PCDH12	PLK4
AK1	CCDC14
GPR126	ZNF3
CLEC14A	POLQ
PROS1	ANLN
ALDH3B1	HIST1H2BC
AQP3	HIST1H2AL
CD44	GTSE1
ALDH2	AP3B2
CAST	BUB3
SLC22A3	CBX5
WIF1	GNG4
CD97	RBBP4
RBMS2	GMPS
CA2	FANCB
PLLP	PAFAH1B3
CD34	XPO5
ABCA8	CDKN3
ARHGAP6	C19orf48
QKI	CDC7
PDLIM2	HMGB2
FYCO1	CDCA2
PLA2G4F	PAICS
NTN4	RAD51AP1
GALNT5	CDC25C
FILIP1	HIST1H2BD
SLC16A5	FZD3
PALMD	FEN1
ALOX15B	PAXIP1
GYPC	ADD2
RNASE1	HLTF
FGFR4	CKAP5
ABLIM3	C17orf75
VSIG2	POLE2
PCDH1	PLK1
GPM6A	USP1
SH2D4A	CCDC99
RHOBTB2	PARP1
SLCO2A1	PSPH
CLEC3B	GMNN
PRKCZ	RNASEH2A
VGLL3	PRKDC
CFD	CCT3
WFS1	ARL6IP1
ARRB1	NUP43
VIPR1	ZNF669
PARVB	GINS1
PTRF	PPM1E
ADRB2	ANKRD32
AQP4	RAD54L
ACADL	ZNF260
PPP1R15A	UPF3B
ADCY4	ZNF670
SLC11A1	HIST1H2BL
GIMAP6	PCNA
WWC2	HIST1H2AK
VWF	C15orf42
SMAD6	CCT2
SH2D3C	SLC16A1
ABCA3	ZWILCH
WWTR1	ZNF551
VIM	OXCT1
SLC34A2	SKP2
SH3D19	FBXO5
GNG11	PIGX
CCDC69	C15orf23
OLR1	HIST1H3I
PRKCH	PARP2
GJA5	FANCD2
CD36	RFC3
SLC19A3	NUP155
FXYD5	HIST1H3B
RASGRF1	AURKA
CAPN3	ZNF749
CNN2	HIST1H2BJ
RIPK3	HDAC2
UNC13D	FOXM1
PTGIR	FBXO45
ADCY9	FKBP3
ANGPT1	XRCC2
PTPRE	ACBD7
CISH	PRR11
HHIP	CKAP2L
PRELP	ZNF326
FCN1	HIST1H3A
PGM5	FANCM
ADAMTS8	NUCKS1
PRKCQ	ZNF607
ALOX5AP	POLA2
HPGD	POLE
RAB11FIP1	RFC2
C10orf54	HOOK1
RILP	CHRNB2
AGTR1	ZNF544
C1orf162	BARD1
FABP4	EXOSC2
GAS7	C5orf34
ALS2CL	UTP11L
ZFP36	ZNF320
GALNTL4	FBL
SH3RF2	CENPN
FLRT3	CASC5
PRKCD	APOO
ANXA1	GPR137C
FMO2	GPR19
PARVA	FANCG
RAMP3	CDCA5
ANXA11	CBX3
PRKCE	HIST1H2BN
RAB27B	RIMBP2
RASL12	NUP54
GATA6	PCSK2
PVRL2	CCNE2
PDE4A	ZNF780B
PODXL	CASP8AP2
RAMP2	WNK3
OLFML1	HIST1H2AB
ADCY7	CENPM
ZFP106	GNAO1
ZFPM2	YEATS4
CGN	ZNF610
PPARG	PPIL1
PXN	HMGB3
CEBPD	CEP250
GKN2	CHAF1A
SLC31A2	PHYHIPL
ADAMTSL4	CDKN2C
RASSF2	CCT5
FRMD4B	CDCA4
CLIC3	ZDHHC13
OVCH2	UNC13A
CD59	ASNS
C7	GRM8
VSIG4	ZNF713
CNN1	CDCA3
CGNL1	CLSPN
PRICKLE2	ZNF766
SIDT2	CENPA
FGR	SMC4
CCDC68	SNAP25
PKNOX2	GATS
AQP9	RIMS2
BTNL9	CACNA1A
AKAP2	C20orf72
C5AR1	GPSM2
FHOD1	POT1
CDC42EP1	SHMT2
RIN2	ZNF643
FBP1	GINS3
FBLN1	HCN3
ZYX	OIP5
PDGFB	RAB3IP
RIN3	AURKB
UNC5C	FRMD5
ACTG2	ZNF557
SMAD7	CCNF
A2M	NUDT21
SLC9A3R2	ACTR6
PTGS2	OCIAD2
RARA	WHSC1
GUCY1A3	HIST1H2AG
CCDC48	HIST1H1C
AXL	CHN2
PMP22	PGBD1
PER1	ASF1B
UTRN	RAD54B
CFLAR	ACYP1
ZBTB4	CHD1L
AMICA1	NUP205
PTGER2	CDC5L
SH3RF1	SMS
AGRN	ZNF93
FHL5	PCSK1
SHC3	HIST1H4A
RFTN1	HACE1
ATP11A	SNRPA
ARHGAP27	ATP8A2
ALOX5	WDR67
CDR1	ZNF85
ACSL5	USP37
APLP2	PSIP1
HLF	ZNF543
ARHGDIB	SNAP91
ADPRH	GRIK3
CD37	GAS2L3
OSMR	PSAT1
GNAI2	ZNF695
YAP1	FANCL
GIMAP1	WASF1
PTPRM	RNF182
C10orf47	HIST1H3C
ACE	C14orf2
CAV2	CEP76
C14orf43	ONECUT2
CACNA2D2	FBXO43
PPAP2B	ZNF611
PTGER4	PROX1
FHL1	GRP
ARHGAP23	PRTFDC1
FOXF1	WDR53
PLCE1	RBL1
UPK3B	CDCA7
WAS	ZNF525
C8orf4	POLB
CD52	ZNF221
OSTF1	RBBP8
GIMAP5	SLC1A4
RAB31	SNHG6
C1orf198	C12orf32
CD9	ASCL1
ARHGEF15	ZNF124
FAM20A	AMPH
CELSR1	CNIH2
FOSL2	RHBDL3
SH3BP5	CDKN2A
CAPN2	CKS1B
ZNF366	ZC3H8
VEGFC	ZMAT4
PLCD1	HN1
RBMS1	ZNF397
PLXDC2	RAD21
B3GNT7	SLC38A1
FGD2	ZNF711
FLT4	HMGN2
GMFG	RDM1
PPM1F	SLC25A40
PEAR1	RAB9B
ASAH1	GTPBP8
PAG1	CADPS
ARHGEF3	C8orf44
PRICKLE1	FAM40B
GSN	FAM64A
PDGFA	HIST1H4L
P2RY1	CHRNA5
C1orf38	AGBL4
ANPEP	ZFP90
BCL9L	ZNF681
GADD45B	EXOSC5
ZFP36L2	POLR3K
SNED1	FKBP4
AHR	ZNF367
FXYD1	GPT2
GNA15	CEP192
RNF149	PCDHB9
CCND3	CIT
HBEGF	H2AFV
FLNA	GPR180
ARHGAP29	ARL6IP6
ATP2C2	PCBP3
CIITA	CCNE1
SLPI	SLC7A14
ATP2B4	CLGN
GDF10	BTBD11
CD300C	ZNF229
GUCY1A2	APITD1
FLI1	SLCO5A1
UNC13B	RIBC2
RAB20	HIST1H3H
RASGRP2	RCC2
PDZK1IP1	FMN2
C19orf33	SMC1A
OSR1	HN1L
RASSF8	PIAS2
SIRPB2	APLP1
HBB	ZNF680
AMOTL2	ZNF706
HCK	CDC25A
PRSS8	FSD1
RHOG	CASP6
RCSD1	B4GALT6
ATOH8	ZNF718
PLCB2	ZNF639
HLA-DMA	WDR62
RAI2	PGBD5
AKNA	ACTL6B
SLC2A10	RNF138
SIGLEC9	ACADM
ACSL1	HIST1H1B
PLD1	AACS
C10orf128	EYA2
FLII	SLC5A3
PTGDS	CLSTN2
GPR157	GEMIN6
RHOC	HES6
SHANK3	ASRGL1
PTGIS	ZYG11A
AVPI1	SH3GL2
C2	ZNF480
BCL6B	HIST1H2BH
CDK6	RAB3B
C11orf9	C18orf54
ZFP36L1	HIST2H2BF
FEZ1	RAB39B
ADARB1	SLC4A8
VAMP8	ZNF510
VCL	C2orf15
CCBE1	ATCAY
PTPN21	PCLO
PMM1	ATP1A3
C10orf11	EYA1
GPD1L	ZIC2
PLA1A	FBXO16
WWC3	CAMK1D
ATXN7	GRM2
C10orf10	RAB3C
HEYL	HOXD10
SIRPB1	C1orf51
C5orf4	SLC2A1
SHE	HIST1H2BG
PCDHGC3	CHGB
OASL	HIST1H3G
GGT1	GTF2A2
PHF15	HIST1H2AH
RECK	PKIB
NXF3	HIST1H2BF
SIAE	CHD7
ETS1	ZNF780A
HIPK3	SMPD3
CEBPB	ADAMTS18
SLCO2B1	ARNTL2
CFTR	ATRNL1
SLC15A2	HIST1H3D
ZBTB38	ZNF528
CCRL2	FADS1
PDXK	ZFP30
VASP	ADCY1
GLI3	RELN
GIMAP7	ZDHHC22
PRX	GPRC5B
ATXN1	CA8
SIPA1	CALB1
HPCAL1	RBP1
C3	B3GALT5
PRF1	FADS2
PTPLA	HIST1H2AE
FAM107A	PHGDH
CD82	ODZ3
RAC2	RGS17
ADRA1A	PEX5L
HCLS1	CAMK2B
CASKIN2	SMAD9
ARHGAP26	SNORA71A
GPR124	RASSF6
BRI3	PKP2
HCST	SIX1
ZBTB16	CBLN1
PRNP	GNG3
GABARAPL1	HIST1H3F
SLC43A2	CHRNA3
CAV1	FGF9
WNT2	HIST2H2BE
RHOF	ASXL3
F11	QPCT
AFAP1L1	ADCYAP1
RASIP1	PRUNE2
RBP4	PROM1
PDGFRB
ATHL1
FSTL3
P2RX1
ADRB1
RASSF5
GNA14
GNLY
HLA-DOA
VAMP5
FCER1G
ZHX2
USP53
CASP1
APOL3
ABCC3
WISP2
ADAMTS9
AKR1C3
CD4
SLIT2
APBB1IP
ACOXL
HMHA1
PODN
PFKFB3
ANKRD1
PIGR
RGS2
C1RL
GRAP2
PML
GBP4
PTAFR
AOX1
GANC
GATA2
CES1
RNF128
HSD17B6
PHACTR2
OLFML2A
CLDN5
FPR1
PARD3B
HECW2
RAB27A
PPP1R14A
GAB1
SLA
FAM46B
PLAC9
VASN
PLAT
ARID5A
PTGDR
REL
ARHGEF6
CMTM8
HDC
ABLIM1
C4orf19
WTIP
ABI3
PLA2G1B
CASP10
PRG4
RASL11A
CD74
PDPN
PDK4
CARD6
HEPH
BTK
ARHGEF17
CASP4
ALDH1A2
FAM78A
SLC44A2
RHBDF2
ACSS2
AEBP1
SLC40A1
AIM1
NUPR1
CHRDL1
GRASP
SLC25A37
C1QC
HLA-DPB1
PDE3A
PCSK5
ASPA
FURIN
VPS37B
HMOX1
FLT1
CLIP4
PHLDB2
PPM1M
ACP5
UPP1
PDGFRA
H6PD
HK3
CD151
FAS
PREX1
OR5P3
CH25H
FOSB
PDLIM1
CD300LF
C1QA
CDH13
C1QB
FCGR2A
HIF3A
PTPRG
HLA-DRB1
CITED2
GPC3
CLEC7A
PRODH
HSPA12B
CD58
CD53
CCL2
PSTPIP2
ARPC1B
PRKCDBP
FMO3
FZD4
CD83
PRAM1
APOC1
PLAUR
CLU
HLA-DQB1
GABRE
PARP4
BCAT1
CFI
ARHGAP24
CA4
CCL21
SLC2A3
SLC5A9
PLAGL1
GIPC1
HLA-DRA
REST
OSCAR
SIGLEC1
SMAD3
USP25
SLC1A1
CD163
GPC5
PLK3
HLA-DMB
BCL3
GAS6
CALCOCO2
CD300E
PDE4D
GCNT4
ALDH1A1
PTPN13
FAM129B
AIF1
GPD1
PLEKHF1
CCR1
CFH
CD69
VDR
ANXA2
SLC6A14
ARHGAP18
GIMAP4
OAS2
EVI2B
BAG3
C1R
FOLR2
CD81
SIRPA
ARHGEF1
ZC3H12A
F2RL3
PARP14
PDLIM5
PLXNA2
HLA-E
ANKRD44
CEACAM6
PIK3AP1
PDLIM3
GRN
HLA-DPA1
PPFIBP1
CD3E
AKR1C1
FTL
FILIP1L
PTPRC
FAM49A
ZEB2
GPRIN3
UNC93B1
HAVCR2
PLK2
C1S
FCGR3A
CAPG
PPIC
CD14
ARHGAP25
XAF1
PLAC8
GUCY1B3
GPX1
FGFR2
RHBDF1
VNN2
RARRES3
CMTM3
PRSS23
CAPN13
PLEK
ANGPTL1
ARRDC4
F13A1
FASN
CMKLR1
AOAH
FOS
RNF122
AASS
GM2A
ARHGAP15
RHOB
SLC38A5
RAB8B
RANBP3L
CCL5
BTG2
C4B
CAB39L
CLEC12A
ARSA
F8
POR
CD274
BTN3A3
FGL2
CCL18
HGF
CCDC17
ABCA6
APOL6
CLIC2
CD109
BCL6
ARID5B
GRAMD2
C3AR1
PIK3R1
SLC7A8
F3
CD86
SLFN5
GBP2
GRK5
ACTA2
PRKG1
SLC7A2
HAS2
FCGRT
PIP5K1B
B4GALT1
BST2
FYB
PLSCR4
ETS2
RAPGEF5
PVRL3
FGD4
AKAP12
CD2
HLA-C
FGF7
C20orf85
FKBP5
PLEKHG1
GBP1
GSTM5
CCND2
P2RX7
RND1
CCND1
RHOJ
ZDHHC11B
FAM101B
RARRES2
SLAMF8
HLA-DQB2
ATF3
AGBL1
CDH11
CECR1
WARS
GLRX
PLTP
PLS3
ADM
ABCC4
PAQR5
HLA-B
HIVEP2
PRDM1
FBN1
HLA-A
FMO5
GFPT2
CCL3
SLC4A4
P2RY8
RND3
PTPN14
FAT4
OLFML3
ARRDC2
G0S2
GPNMB
CLEC4E
CD3G
HMCN1
FXYD3
SLC5A8
CD38
CD84
CCDC80
ADAMTS4
CHIT1
AGR3
